# Supplementary material for: A Carbon‐ and Binder‐Free Nanostructured Cathode for High‐Performance Nonaqueous Li‐O2 Battery
Source: PubMed Central journal article supplement (PMC5115428; doi:10.1002/advs.201500092), 2015-06-18
Supplement: ADVS-2-0f-s001.pdf [file ADVS-2-0f-s001.pdf]

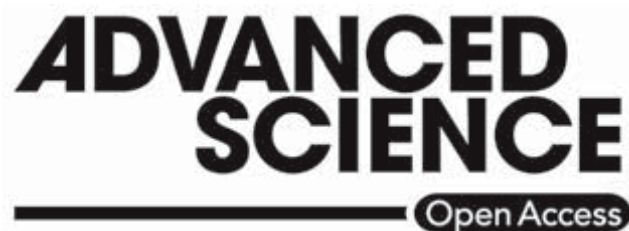

## Supporting Information

for *Adv. Sci.*, DOI: 10.1002/advs.201500092

A Carbon- and Binder-Free Nanostructured Cathode for High-Performance Nonaqueous Li-O<sub>2</sub> Battery

*Yueqi Chang, Shanmu Dong, Yuhang Ju, Dongdong Xiao, Xinhong Zhou, Lixue Zhang, Xiao Chen, Chaoqun Shang, Lin Gu, Zhangquan Peng,\* and Guanglei Cui\**

## Supporting Information

A Carbon&Binder-Free Nanostructured Cathode for High Performance Non-aqueous Li-O<sub>2</sub> Battery

Yueqi Chang, Shanmu Dong, Yuhang Ju, Dongdong Xiao, Xinhong Zhou, Lixue Zhang, Xiao Chen, Chaoqun Shang, Lin Gu, Zhangquan Peng\* and Guanglei Cui\*

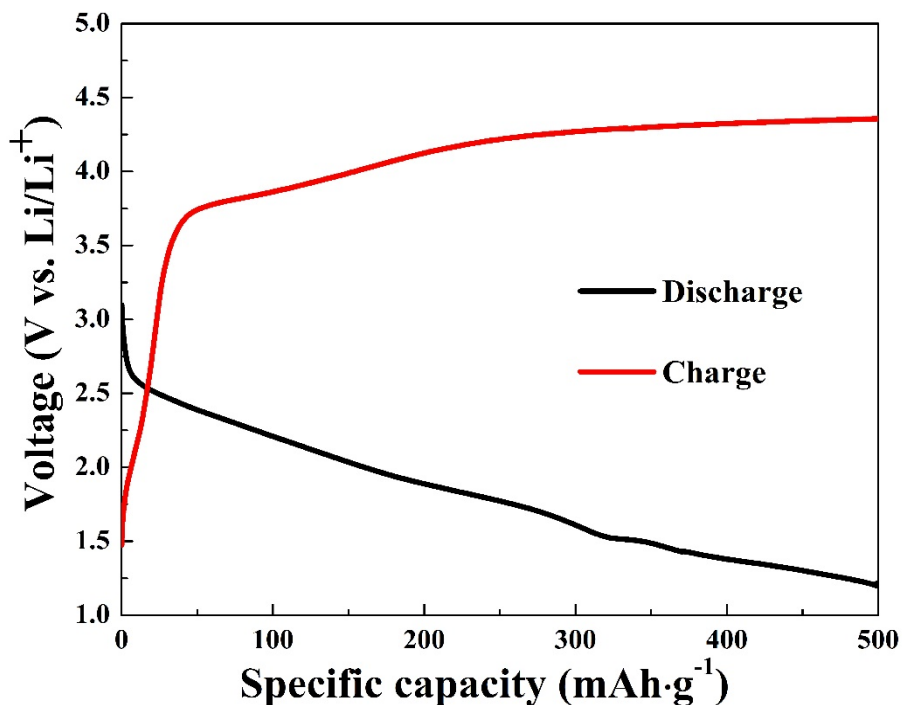

**Figure S1.** Li-O<sub>2</sub> cell discharge/charge profiles of commercial TiN nanoparticles-based electrodes in TEGDME electrolyte containing 1 M LiTFSI with a cut-off capacity of 500 mAh g<sup>-1</sup> at the current density of 50 mA g<sup>-1</sup> for the first cycle.

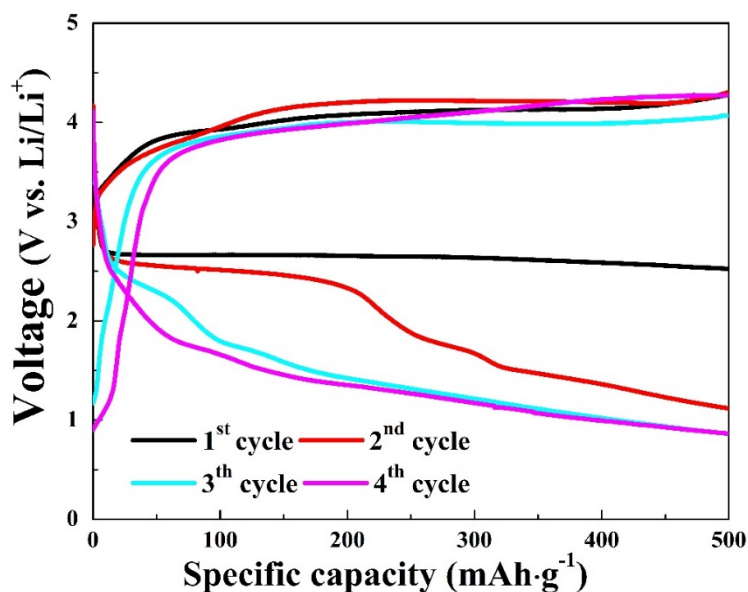

**Figure S2.** Discharge and charge voltage profiles of the RuO<sub>x</sub>/Super P-based cell at various cycles with a cut-off capacity of 500 mAh g<sup>-1</sup> at the -current density of 50mA g<sup>-1</sup>.

The SP owns excellent electronic conductivity. However, SP as a kind of carbon materials can react with Li<sub>2</sub>O<sub>2</sub> to the formation of Li<sub>2</sub>CO<sub>3</sub>, which cause the large overpotential. The RuO<sub>x</sub>/TiN NTA as a carbon-free material can avoid the formation of Li<sub>2</sub>CO<sub>3</sub>. Moreover, the PTFE as binder in RuO<sub>x</sub>/SP electrodes have been reported to be unstable in an oxidizing environment (superoxides), which may further aggravate the degradation of electrode interface. Therefore, the overpotential of RuO<sub>x</sub>/TiN NTA is much lower than that of RuO<sub>x</sub>/SP.

The preparation method of RuO<sub>x</sub>/ SP electrode was expounded in Experimental Section. It should be noting that the structure of electrode and the load mass of electrode material both can significantly affect the discharge/charge curves. The superior discharge performances in many published works were achieved by cathodes with different morphology and loading mass. However, electrode preparation methods in this paper is a typical way to fabricate electrode with carbon and PTFE, which is generally viewed as a relative stable binder.

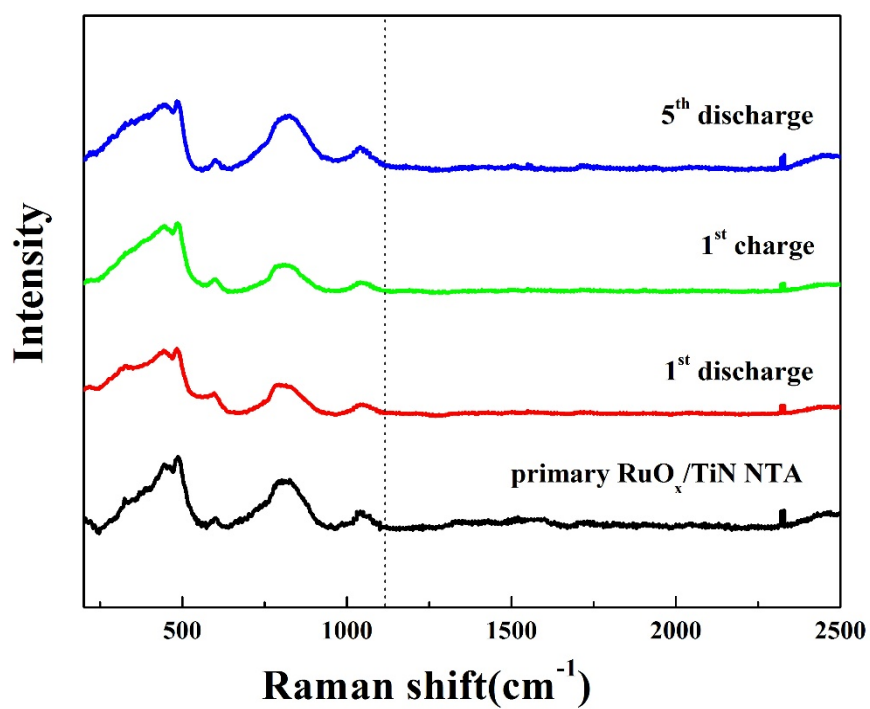

**Figure S3.** Raman spectra of RuO<sub>x</sub>/TiN NTA cathode at different stages. The dash line is the local of Li<sub>2</sub>CO<sub>3</sub> characteristic peak.

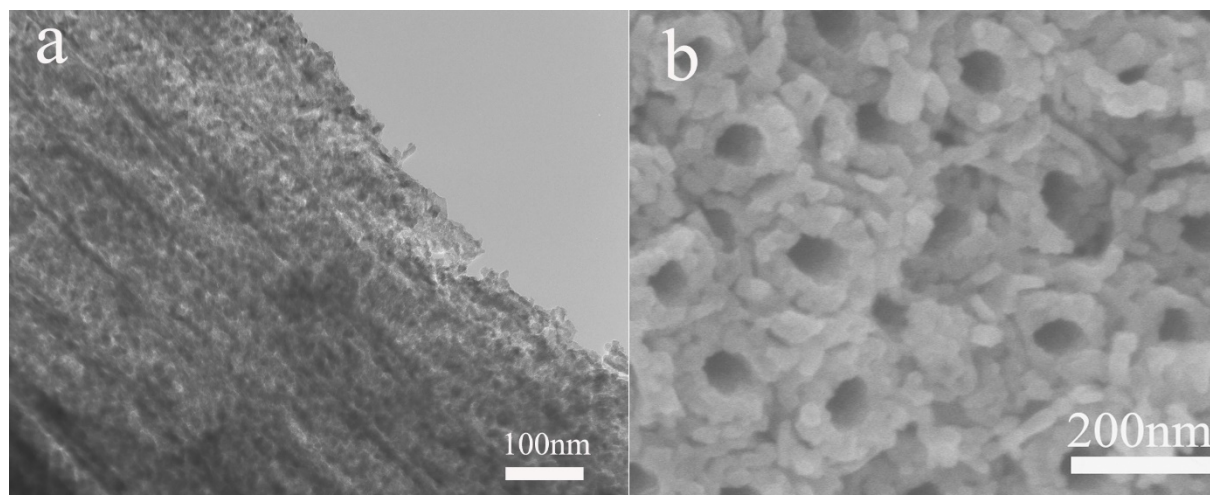

**Figure S4.** (a) STEM image and (b) SEM image of RuO<sub>x</sub>/TiN NTA after 10 cycles.

The STEM and SEM images of RuO<sub>x</sub>/TiN NTA after 10 cycles is displayed in Figure S4 and the electrode exhibits no significant change on the surface after cycles. The result indicates the stability of RuO<sub>x</sub>/TiN NTA electrode.

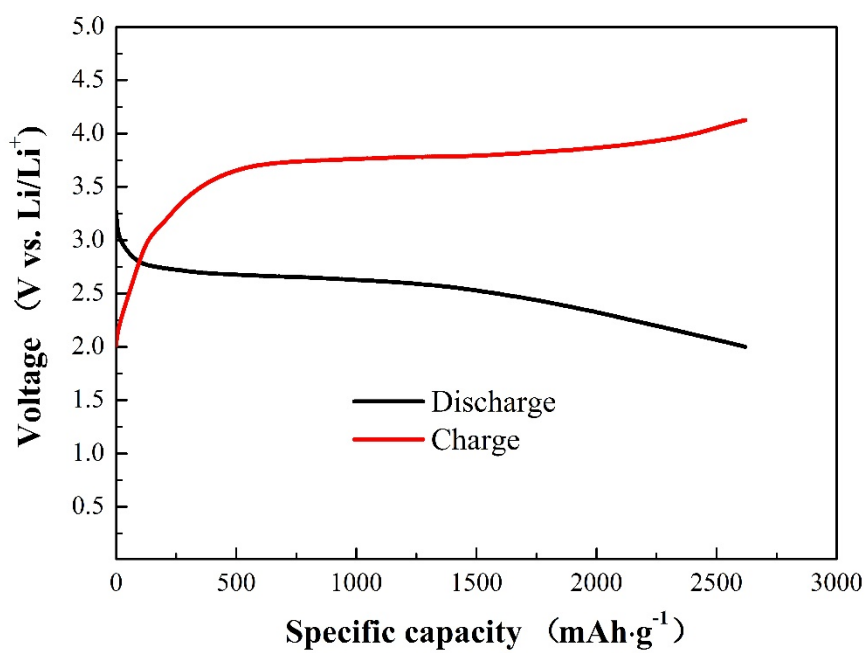

**Figure S5** The full discharge-charge curves of RuO<sub>x</sub>/TiN NTA at the current density of 50 mA g<sup>-1</sup>.

|                           | Discharge | Charge | O <sub>2</sub> (OER/ORR) |
|---------------------------|-----------|--------|--------------------------|
| RuO <sub>x</sub> /TiN NTA | 2.41      | 2.93   | 0.822                    |
| Super P                   | 2.39      | 4.38   | 0.545                    |

**Table S1** The  $e^-/O_2$  value data for discharge and charge of the RuO<sub>x</sub>/TiN NTA electrode and Super P electrode.

The  $e^-/O_2$  ratio of ORR for RuO<sub>x</sub>/TiN NTA is slightly higher than that of Super P, noting that the capacity above 3.0 V at the very beginning may be attributed to the pseudocapacitance of RuO<sub>x</sub> and TiN (Reference 16 and 27). During the charge process, the ratio is notably higher than for  $e^-/O_2$  both of the two electrodes. Although the TiN NTA substrate (with a relative lower  $e^-/O_2$ ) avoids side reaction caused by carbon decomposition, the decomposition of electrolyte cannot be precluded.
